# Supplementary material
Source: PubMed Central journal article supplement (PMC6906607)
Supplement: NIHMS1061428-supplement-Supporting_Information.pdf [file NIHMS1061428-supplement-Supporting_Information.pdf]

**Supporting Information for:**

Quantification of D-Ala-D-Lac terminated  
peptidoglycan structure in vancomycin-resistant  
*Enterococcus faecalis* using a combined solid-state  
NMR and mass spectrometry analysis

James D. Chang,<sup>†</sup> Erin E. Foster,<sup>†</sup> Hao Yang,<sup>‡</sup> and Sung Joon Kim<sup>\*,†</sup>

<sup>†</sup>Department of Chemistry and Biochemistry, Baylor University, Waco, Texas 76798, United States. <sup>‡</sup>Department of Chemistry, Washington University, St. Louis, Missouri 63130, United States.

KEYWORDS: Vancomycin, REDOR, *E. faecalis*, Peptidoglycan, and solid-state NMR.

(a)

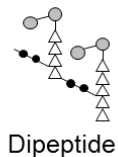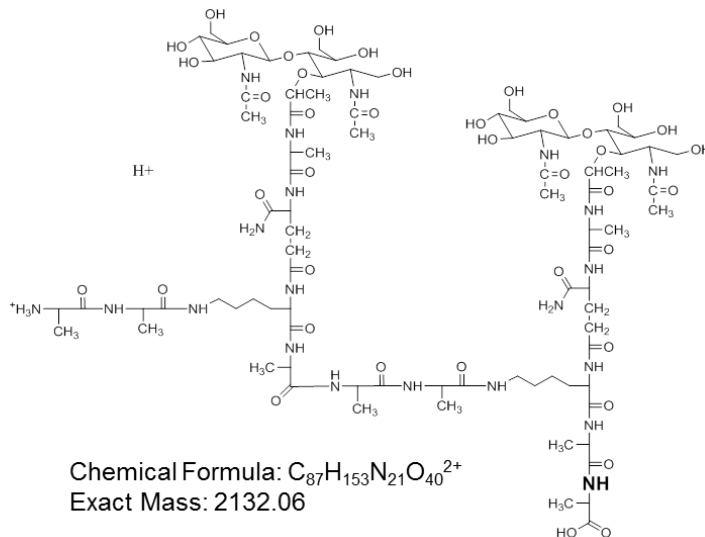

(b)

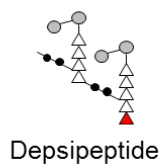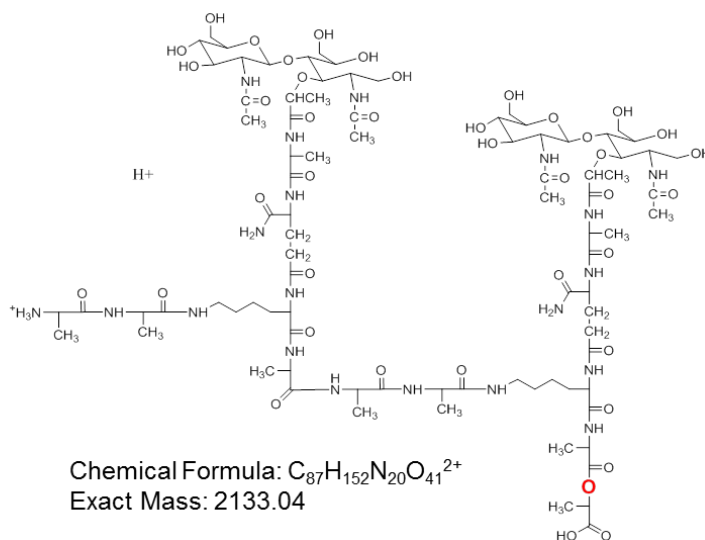

Supplementary Figure S1. (a) Chemical structure of a PG dimer with a pentapeptide stem terminating in D-Ala-D-Ala from vancomycin-resistant *E. faecalis* (ATCC 51299) grown in absence of vancomycin. (b) Chemical structure of a PG dimer with a pentapeptide stem terminating in D-Ala-D-Lac from vancomycin-resistant *E. faecalis* grown in presence of vancomycin (6  $\mu\text{g}/\text{mL}$ ).

Supplementary Table S1. List of peptidoglycan fragments observed by LC-MS for vancomycin-resistant *E. faecalis* (ATCC 51299) grown in absence of vancomycin during the exponential growth phase (OD<sub>600</sub> 0.6). Chemical formula shown are for non-ionized peptidoglycan fragments.

| Chemical Formula | Charge Obs. | Calculated (m/z) | Observed <sup>1</sup> (m/z) | Scaled integral <sup>1</sup> | Observed <sup>2</sup> m/z | Scaled integral <sup>2</sup> | Observed <sup>3</sup> m/z | Scaled integral <sup>3</sup> |
|------------------|-------------|------------------|-----------------------------|------------------------------|---------------------------|------------------------------|---------------------------|------------------------------|
| C41H71N9O20      | 2           | 463.7375         | 463.7178                    | 447                          | 463.7178                  | 676                          | 463.7178                  | 579                          |
| C39H70N9O19      | 2           | 484.7428         | 484.7287                    | 6634                         | 484.7287                  | 5819                         | 484.7287                  | 5241                         |
| C42H75N10O20     | 2           | 520.2613         | 520.2299                    | 9960                         | 520.2200                  | 9268                         | 520.2200                  | 10324                        |
| C47H81N11O22     | 2           | 534.7746         | 534.7697                    | 21398                        | 534.7697                  | 19110                        | 534.7697                  | 18118                        |
| C44H77N10O21     | 2           | 541.2666         | 541.2915                    | 39512                        | 541.2915                  | 46283                        | 541.2915                  | 38861                        |
| C45H80N11O21     | 2           | 555.7799         | 555.7808                    | 6400                         | 555.7705                  | 6553                         | 555.7705                  | 6319                         |
| C47H82N11O22     | 2           | 576.7852         | 576.8089                    | 30515                        | 576.7984                  | 27483                        | 576.7984                  | 24854                        |
| C83H143N19O39    | 3           | 649.6599         | 649.6593                    | 241794                       | 649.6593                  | 288311                       | 649.6593                  | 264532                       |
| C83H143N19O39    | 2           | 973.9862         | 973.9894                    | 136465                       | 973.9894                  | 147705                       | 973.9894                  | 110714                       |
| C81H142N19O38    | 3           | 663.6634         | 663.6667                    | 2873710                      | 663.6667                  | 3271206                      | 663.6667                  | 2885170                      |
| C81H142N19O38    | 2           | 994.9915         | 995.0037                    | 3517480                      | 995.0037                  | 3589885                      | 995.0037                  | 3321445                      |
| C81H142N19O38    | 1           | 1988.9758        | 1988.9984                   | 11906                        | 1988.9984                 | 14281                        | 1988.9984                 | 12878                        |
| C86H148N20O40    | 3           | 673.3390         | 673.3409                    | 63263                        | 673.3409                  | 59571                        | 673.3409                  | 77303                        |
| C86H148N20O40    | 2           | 1009.5048        | 1009.5031                   | 28309                        | 1009.5031                 | 39483                        | 1009.5031                 | 32686                        |
| C83H144N19O39    | 3           | 677.6670         | 677.6758                    | 362929                       | 677.6758                  | 389742                       | 677.6758                  | 365868                       |
| C83H144N19O39    | 2           | 1015.9968        | 1016.0197                   | 446557                       | 1016.0197                 | 494266                       | 1016.0197                 | 404279                       |
| C84H147N20O39    | 3           | 687.3425         | 687.3481                    | 806433                       | 687.3481                  | 892086                       | 687.3481                  | 731617                       |
| C84H147N20O39    | 2           | 1030.5101        | 1030.5168                   | 607893                       | 1030.5168                 | 615535                       | 1030.5168                 | 528643                       |
| C89H153N21O41    | 3           | 697.0180         | 697.0199                    | 533224                       | 697.0199                  | 593223                       | 697.0199                  | 564200                       |
| C89H153N21O41    | 2           | 1045.0234        | 1045.0317                   | 137847                       | 1045.0317                 | 146790                       | 1045.0175                 | 134022                       |
| C86H149N20O40    | 3           | 701.3460         | 701.3607                    | 180926                       | 701.3607                  | 162305                       | 701.3607                  | 222672                       |
| C87H152N21O40    | 3           | 711.0215         | 711.0255                    | 6588213                      | 711.0255                  | 6844143                      | 711.0255                  | 6299936                      |
| C87H152N21O40    | 2           | 1066.0286        | 1066.0393                   | 4289477                      | 1066.0393                 | 4568330                      | 1066.0393                 | 3540535                      |
| C89H154N21O41    | 3           | 725.0250         | 725.0293                    | 193347                       | 725.0293                  | 231622                       | 725.0293                  | 184973                       |
| C89H154N21O41    | 2           | 1087.0339        | 1087.0400                   | 91320                        | 1087.0400                 | 90624                        | 1087.0400                 | 80893                        |
| C125H215N29O58   | 4           | 742.6211         | 742.6517                    | 140831                       | 742.6279                  | 144291                       | 742.6279                  | 140831                       |
| C125H215N29O58   | 3           | 989.8258         | 989.8596                    | 336790                       | 989.8322                  | 491136                       | 989.8184                  | 295785                       |
| C123H214N29O57   | 4           | 753.1238         | 753.1351                    | 905646                       | 753.1231                  | 930088                       | 753.1231                  | 859448                       |
| C123H214N29O57   | 3           | 1003.8293        | 1003.8375                   | 3393731                      | 1003.8375                 | 3701847                      | 1003.8375                 | 3393823                      |
| C123H214N29O57   | 2           | 1505.2403        | 1505.2425                   | 204061                       | 1505.2425                 | 210740                       | 1505.2425                 | 197147                       |
| C128H220N30O59   | 4           | 760.3804         | 760.4135                    | 83700                        | 760.3895                  | 76629                        | 760.3775                  | 76359                        |
| C128H220N30O59   | 3           | 1013.5048        | 1013.5441                   | 81477                        | 1013.5024                 | 59489                        | 1013.5024                 | 81261                        |
| C125H216N29O58   | 4           | 763.6264         | 763.6437                    | 222873                       | 763.6437                  | 272307                       | 763.6316                  | 285042                       |
| C125H216N29O58   | 3           | 1017.8328        | 1017.8436                   | 456649                       | 1017.8436                 | 459953                       | 1017.8436                 | 425309                       |
| C125H216N29O58   | 2           | 1526.2456        | 1526.2691                   | 45150                        | 1526.2691                 | 35775                        | 1526.2691                 | 48069                        |
| C126H219N30O58   | 4           | 770.8831         | 770.8877                    | 244108                       | 770.8877                  | 244158                       | 770.8877                  | 201911                       |
| C126H219N30O58   | 3           | 1027.5083        | 1027.5055                   | 805735                       | 1027.5055                 | 692226                       | 1027.5055                 | 1122453                      |
| C126H219N30O58   | 2           | 1540.7588        | 1540.7507                   | 41517                        | 1540.7507                 | 51975                        | 1540.7507                 | 63011                        |

|                |   |           |           |         |           |         |           |         |
|----------------|---|-----------|-----------|---------|-----------|---------|-----------|---------|
| C131H225N31O60 | 4 | 778.1397  | 778.1418  | 327079  | 778.1539  | 283500  | 778.1418  | 272770  |
| C131H225N31O60 | 3 | 1037.1838 | 1037.2271 | 421811  | 1037.1989 | 398875  | 1037.1848 | 407398  |
| C129H224N31O59 | 4 | 788.6423  | 788.6511  | 1157533 | 788.6511  | 1247761 | 788.6388  | 1120764 |
| C129H224N31O59 | 3 | 1051.1874 | 1051.1945 | 4701929 | 1051.1945 | 4843200 | 1051.1945 | 5171673 |
| C129H224N31O59 | 2 | 1576.2774 | 1576.2742 | 289585  | 1576.2742 | 305282  | 1576.2742 | 289260  |
| C131H226N31O60 | 3 | 1065.1909 | 1065.2269 | 76806   | 1065.2126 | 79128   | 1065.2269 | 59425   |
| C167H287N39O77 | 4 | 997.7455  | 997.7877  | 74974   | 997.7601  | 75153   | 997.7463  | 68375   |
| C167H287N39O77 | 3 | 1329.9916 | 1330.0541 | 68177   | 1329.9904 | 57197   | 1329.9904 | 70747   |
| C165H286N39O76 | 4 | 1008.2482 | 1008.2550 | 1330279 | 1008.2550 | 1239789 | 1008.2550 | 1249994 |
| C165H286N39O76 | 3 | 1343.9951 | 1343.9912 | 582757  | 1343.9912 | 648261  | 1343.9912 | 640974  |
| C170H292N40O78 | 4 | 1015.5048 | 1015.5466 | 156051  | 1015.5048 | 82037   | 1015.5048 | 98394   |
| C170H292N40O78 | 3 | 1353.6706 | 1353.7245 | 32922   | 1353.6602 | 26541   | 1353.6602 | 28884   |
| C167H288N39O77 | 4 | 1018.7508 | 1018.7492 | 193790  | 1018.7632 | 234437  | 1018.7632 | 220166  |
| C167H288N39O77 | 3 | 1357.9986 | 1358.0170 | 160069  | 1358.0170 | 131095  | 1358.0170 | 123630  |
| C168H291N40O77 | 4 | 1026.0074 | 1026.0085 | 418962  | 1026.0085 | 391427  | 1026.0085 | 368087  |
| C168H291N40O77 | 3 | 1367.6742 | 1367.6717 | 145388  | 1367.6556 | 163152  | 1367.6717 | 131164  |
| C173H297N41O79 | 4 | 1033.2641 | 1033.3077 | 330082  | 1033.2796 | 305294  | 1033.2656 | 344194  |
| C173H297N41O79 | 3 | 1377.3497 | 1377.4092 | 66677   | 1377.3606 | 63408   | 1377.3444 | 46727   |
| C171H296N41O78 | 4 | 1043.7667 | 1043.7619 | 1447687 | 1043.7619 | 1929308 | 1043.7619 | 1412777 |
| C171H296N41O78 | 3 | 1391.3532 | 1391.3635 | 516607  | 1391.3473 | 548238  | 1391.3473 | 511333  |
| C173H298N41O79 | 4 | 1054.2694 | 1054.2686 | 143438  | 1054.2686 | 110148  | 1054.2686 | 91491   |

<sup>1,2,3</sup> Observed peaks (m/z) and their corresponding integrals in three independent measurements.

Supplementary Table S2. List of peptidoglycan fragments observed by LC-MS for vancomycin-resistant *E. faecalis* (ATCC 51299) grown in absence of vancomycin during the stationary growth phase ( $OD_{600} > 1.0$ ). Chemical formula shown are for non-ionized peptidoglycan fragments.

| Chemical Formula | Charge Obs. | Calculated (m/z) | Observed <sup>1</sup> (m/z) | Scaled integral <sup>1</sup> | Observed <sup>2</sup> m/z | Scaled integral <sup>2</sup> | Observed <sup>3</sup> m/z | Scaled integral <sup>3</sup> |
|------------------|-------------|------------------|-----------------------------|------------------------------|---------------------------|------------------------------|---------------------------|------------------------------|
| C39H70N9O19      | 2           | 484.7428         | 484.7328                    | 3825                         | 484.7136                  | 3794                         | 484.7136                  | 3261                         |
| C44H76N10O21     | 2           | 499.2560         | 499.2390                    | 12526                        | 499.2195                  | 11112                        | 499.2195                  | 12123                        |
| C41H72N9O20      | 2           | 505.7480         | 505.7472                    | 17777                        | 505.7374                  | 15951                        | 505.7276                  | 15962                        |
| C42H75N10O20     | 2           | 520.2613         | 520.2137                    | 6147                         | 520.2038                  | 8567                         | 520.2038                  | 5948                         |
| C47H81N11O22     | 2           | 534.7746         | 534.7630                    | 6628                         | 534.7530                  | 7054                         | 534.7428                  | 6949                         |
| C44H77N10O21     | 2           | 541.2666         | 541.2645                    | 4407                         | 541.2543                  | 4400                         | 541.2441                  | 5516                         |
| C45H80N11O21     | 2           | 555.7799         | 555.7738                    | 5033                         | 555.7635                  | 5041                         | 555.7532                  | 4157                         |
| C47H82N11O22     | 2           | 576.7852         | 576.7490                    | 18718                        | 576.7385                  | 34097                        | 576.7280                  | 27531                        |
| C83H143N19O39    | 3           | 649.6599         | 649.6613                    | 69068                        | 649.6502                  | 83796                        | 649.6390                  | 78303                        |
| C83H143N19O39    | 2           | 973.9862         | 973.9999                    | 52259                        | 973.9726                  | 49851                        | 973.9590                  | 56795                        |
| C81H142N19O38    | 3           | 663.6634         | 663.6685                    | 905565                       | 663.6685                  | 954386                       | 663.6685                  | 898929                       |
| C81H142N19O38    | 2           | 994.9915         | 995.0002                    | 1618058                      | 995.0002                  | 1631511                      | 995.0002                  | 1676440                      |
| C81H142N19O38    | 1           | 1988.9758        | 1988.9947                   | 3187                         | 1988.9947                 | 3704                         | 1988.9947                 | 4495                         |
| C86H148N20O40    | 3           | 673.3390         | 673.3425                    | 33084                        | 673.3312                  | 33055                        | 673.3199                  | 30331                        |
| C86H148N20O40    | 2           | 1009.5048        | 1009.5133                   | 35230                        | 1009.4855                 | 32814                        | 1009.4716                 | 39402                        |
| C83H144N19O39    | 3           | 677.6670         | 677.6773                    | 204501                       | 677.6773                  | 286480                       | 677.6773                  | 218086                       |
| C83H144N19O39    | 2           | 1015.9968        | 1016.0019                   | 420071                       | 1016.0019                 | 346105                       | 1016.0019                 | 386513                       |
| C84H147N20O39    | 3           | 687.3425         | 687.3496                    | 512511                       | 687.3496                  | 526170                       | 687.3496                  | 541000                       |
| C84H147N20O39    | 2           | 1030.5101        | 1030.5266                   | 578959                       | 1030.5266                 | 607029                       | 1030.5266                 | 592330                       |
| C89H153N21O41    | 3           | 697.0180         | 697.0212                    | 212483                       | 697.0096                  | 210566                       | 696.9981                  | 210171                       |
| C89H153N21O41    | 2           | 1045.0234        | 1044.9850                   | 72461                        | 1044.9992                 | 71087                        | 1044.9850                 | 72461                        |
| C86H149N20O40    | 3           | 701.3460         | 701.3504                    | 107657                       | 701.3504                  | 111273                       | 701.3504                  | 99164                        |
| C87H152N21O40    | 3           | 711.0215         | 711.0266                    | 3072508                      | 711.0266                  | 3083289                      | 711.0266                  | 2826401                      |
| C87H152N21O40    | 2           | 1066.0286        | 1066.0346                   | 2552988                      | 1066.0346                 | 2576393                      | 1066.0346                 | 2609712                      |
| C89H154N21O41    | 3           | 725.0250         | 725.0302                    | 187538                       | 725.0302                  | 211078                       | 725.0302                  | 253437                       |
| C89H154N21O41    | 2           | 1087.0339        | 1087.0493                   | 149278                       | 1087.0493                 | 149192                       | 1087.0493                 | 151790                       |
| C125H215N29O58   | 4           | 742.6211         | 742.6286                    | 26214                        | 742.6048                  | 33292                        | 742.6048                  | 25983                        |
| C125H215N29O58   | 3           | 989.8258         | 989.8287                    | 171323                       | 989.8013                  | 170646                       | 989.7875                  | 160370                       |
| C123H214N29O57   | 4           | 753.1238         | 753.1356                    | 196401                       | 753.1116                  | 197456                       | 753.0996                  | 207928                       |
| C123H214N29O57   | 3           | 1003.8293        | 1003.8338                   | 2155397                      | 1003.8062                 | 2279513                      | 1003.7923                 | 2197304                      |
| C123H214N29O57   | 2           | 1505.2403        | 1505.2462                   | 102483                       | 1505.2124                 | 121434                       | 1505.1956                 | 121968                       |
| C128H220N30O59   | 4           | 760.3804         | 760.3898                    | 20902                        | 760.3658                  | 20523                        | 760.3538                  | 17784                        |
| C128H220N30O59   | 3           | 1013.5048        | 1013.5125                   | 43648                        | 1013.4708                 | 43081                        | 1013.4708                 | 39139                        |
| C125H216N29O58   | 3           | 1017.8328        | 1017.8397                   | 690630                       | 1017.8119                 | 722741                       | 1017.8180                 | 695179                       |
| C125H216N29O58   | 2           | 1526.2456        | 1526.2557                   | 36666                        | 1526.2044                 | 28262                        | 1526.2044                 | 51941                        |
| C126H219N30O58   | 4           | 770.8831         | 770.8880                    | 85893                        | 770.8758                  | 100360                       | 770.8637                  | 86822                        |

|                |   |           |           |         |           |         |           |         |
|----------------|---|-----------|-----------|---------|-----------|---------|-----------|---------|
| C126H219N30O58 | 3 | 1027.5083 | 1027.5154 | 965190  | 1027.4874 | 928349  | 1027.4734 | 1005702 |
| C126H219N30O58 | 2 | 1540.7588 | 1540.7713 | 47666   | 1540.7199 | 50000   | 1540.7027 | 55500   |
| C127H218N29O59 | 3 | 1031.8363 | 1031.8445 | 140192  | 1031.8164 | 139087  | 1031.8024 | 72684   |
| C131H225N31O60 | 4 | 778.1397  | 778.1175  | 73898   | 778.1296  | 87003   | 778.1175  | 80707   |
| C131H225N31O60 | 3 | 1037.1838 | 1037.1948 | 293623  | 1037.1666 | 304181  | 1037.1525 | 316007  |
| C128H221N30O59 | 3 | 1041.5118 | 1041.4736 | 142918  | 1041.4878 | 134224  | 1041.4736 | 149221  |
| C128H221N30O59 | 2 | 1561.7641 | 1561.7847 | 3009    | 1561.7157 | 6392    | 1561.7157 | 8073    |
| C129H224N31O59 | 4 | 788.6423  | 788.6510  | 500224  | 788.6265  | 469973  | 788.6142  | 489812  |
| C129H224N31O59 | 3 | 1051.1874 | 1051.2041 | 4660766 | 1051.1617 | 4834726 | 1051.1475 | 5016835 |
| C129H224N31O59 | 2 | 1576.2774 | 1576.2944 | 209182  | 1576.2442 | 233681  | 1576.2251 | 248433  |
| C131H226N31O60 | 3 | 1065.1909 | 1065.1937 | 434055  | 1065.1652 | 442245  | 1065.1509 | 451662  |
| C131H226N31O60 | 2 | 1597.2827 | 1597.3036 | 17345   | 1597.2513 | 27976   | 1597.2338 | 18210   |
| C133H228N31O61 | 3 | 1079.1944 | 1079.2039 | 67928   | 1079.1752 | 91979   | 1079.1608 | 39435   |
| C167H287N39O77 | 4 | 997.7455  | 997.7566  | 64081   | 997.7290  | 59870   | 997.7152  | 58818   |
| C167H287N39O77 | 3 | 1329.9916 | 1330.0127 | 29667   | 1329.9490 | 39006   | 1329.9490 | 23406   |
| C165H286N39O76 | 4 | 1008.2482 | 1008.2513 | 793986  | 1008.2236 | 804403  | 1008.2097 | 635153  |
| C165H286N39O76 | 3 | 1343.9951 | 1344.0133 | 410496  | 1343.9653 | 586172  | 1343.9493 | 403651  |
| C170H292N40O78 | 4 | 1015.5048 | 1015.5149 | 38079   | 1015.4731 | 30502   | 1015.4731 | 50379   |
| C170H292N40O78 | 3 | 1353.6706 | 1353.6823 | 16174   | 1353.6180 | 26154   | 1353.6180 | 21961   |
| C167H288N39O77 | 4 | 1018.7508 | 1018.7592 | 161973  | 1018.7174 | 174808  | 1018.7174 | 142061  |
| C167H288N39O77 | 3 | 1357.9986 | 1358.0230 | 114344  | 1357.9585 | 104432  | 1357.9425 | 96472   |
| C168H291N40O77 | 4 | 1026.0074 | 1026.0185 | 333957  | 1025.9765 | 371712  | 1025.9765 | 509946  |
| C168H291N40O77 | 3 | 1367.6742 | 1367.6775 | 163616  | 1367.6453 | 144828  | 1367.6291 | 169231  |
| C169H290N39O78 | 4 | 1029.2534 | 1029.2656 | 43908   | 1029.2376 | 84253   | 1029.2236 | 67623   |
| C169H290N39O78 | 3 | 1372.0022 | 1372.0082 | 47034   | 1371.9597 | 18355   | 1371.9597 | 19488   |
| C173H297N41O79 | 4 | 1033.2641 | 1033.2754 | 210812  | 1033.2473 | 295431  | 1033.2333 | 214325  |
| C173H297N41O79 | 3 | 1377.3497 | 1377.3663 | 53793   | 1377.3177 | 49636   | 1377.3015 | 58011   |
| C170H293N40O78 | 4 | 1036.5101 | 1036.5200 | 31790   | 1036.4919 | 19288   | 1036.4637 | 35209   |
| C170H293N40O78 | 3 | 1381.6777 | 1381.6777 | 0       | 1381.6311 | 21360   | 1381.6346 | 0       |
| C171H296N41O78 | 4 | 1043.7667 | 1043.7715 | 1697590 | 1043.7433 | 1597997 | 1043.7293 | 1567770 |
| C171H296N41O78 | 3 | 1391.3532 | 1391.3691 | 568098  | 1391.3202 | 657280  | 1391.3040 | 633849  |
| C173H298N41O79 | 4 | 1054.2694 | 1054.2783 | 252507  | 1054.2498 | 252555  | 1054.2357 | 163122  |
| C173H298N41O79 | 3 | 1405.3567 | 1405.3609 | 95321   | 1405.3117 | 72738   | 1405.2953 | 45125   |
| C175H300N41O80 | 4 | 1064.7720 | 1064.7662 | 20137   | 1064.7519 | 35368   | 1064.7378 | 28409   |

<sup>1,2,3</sup> Observed peaks (m/z) and their corresponding integrals in three independent measurements.

Supplementary Table S3. List of peptidoglycan fragments observed by LC-MS for vancomycin-resistant *E. faecalis* (ATCC 51299) grown in presence of vancomycin (6 µg/mL) during the exponential growth phase (OD<sub>600</sub> 0.6). Chemical formula shown are for non-ionized peptidoglycan fragments.

| Chemical Formula | Charge Obs. | Calculated (m/z) | Observed <sup>1</sup> (m/z) | Scaled integral <sup>1</sup> | Observed <sup>2</sup> m/z | Scaled integral <sup>2</sup> | Observed <sup>3</sup> m/z | Scaled integral <sup>3</sup> |
|------------------|-------------|------------------|-----------------------------|------------------------------|---------------------------|------------------------------|---------------------------|------------------------------|
| C41H71N9O20      | 2           | 463.7375         | 463.7106                    | 671                          | 463.7012                  | 1081                         | 463.7012                  | 747                          |
| C39H70N9O19      | 2           | 484.7428         | 484.7211                    | 27966                        | 484.7307                  | 28976                        | 484.7307                  | 14348                        |
| C44H76N10O21     | 2           | 499.2560         | 499.2175                    | 3438                         | 499.2175                  | 3084                         | 499.2175                  | 1943                         |
| C42H75N10O20     | 2           | 520.2613         | 520.2617                    | 55362                        | 520.2617                  | 50957                        | 520.2716                  | 43916                        |
| C47H81N11O22     | 2           | 534.7746         | 534.8016                    | 3560                         | 534.8016                  | 8151                         | 534.8016                  | 7501                         |
| C47H80N10O23     | 2           | 535.2666         | 535.2561                    | 2013                         | 535.2359                  | 3602                         | 535.2359                  | 3145                         |
| C44H77N10O21     | 2           | 541.2666         | 541.2831                    | 18540                        | 541.2831                  | 18057                        | 541.2932                  | 17237                        |
| C45H80N11O21     | 2           | 555.7799         | 555.7516                    | 1692                         | 555.7516                  | 1448                         | 555.7516                  | 1395                         |
| C45H79N10O22     | 2           | 556.2719         | 556.2559                    | 4254                         | 556.2559                  | 4914                         | 556.2559                  | 4884                         |
| C47H82N11O22     | 2           | 576.7852         | 576.7579                    | 1631                         | 576.7579                  | 1771                         | 576.7579                  | 1833                         |
| C47H81N10O23     | 2           | 577.2772         | 577.2613                    | 3093                         | 577.2718                  | 4264                         | 577.2718                  | 2688                         |
| C83H143N19O39    | 3           | 649.6599         | 649.6603                    | 171032                       | 649.6603                  | 164780                       | 694.6580                  | 137087                       |
| C83H143N19O39    | 2           | 973.9862         | 973.9877                    | 97972                        | 973.9877                  | 91597                        | 973.9877                  | 82206                        |
| C81H142N19O38    | 3           | 663.6634         | 663.6676                    | 1477601                      | 663.6676                  | 1501173                      | 663.6676                  | 1301409                      |
| C81H142N19O38    | 2           | 994.9915         | 994.9881                    | 1735321                      | 994.9881                  | 1814267                      | 994.9881                  | 1955810                      |
| C86H148N20O40    | 3           | 673.3390         | 673.3417                    | 201959                       | 673.3417                  | 163178                       | 673.3417                  | 176763                       |
| C86H148N20O40    | 2           | 1009.5048        | 1009.5012                   | 66646                        | 1009.5151                 | 64195                        | 1009.5151                 | 49003                        |
| C83H144N19O39    | 3           | 677.6670         | 677.6652                    | 117166                       | 677.6652                  | 169580                       | 677.6652                  | 144424                       |
| C83H144N19O39    | 2           | 1015.9968        | 1016.0038                   | 317272                       | 1016.0038                 | 266705                       | 1016.0038                 | 220349                       |
| C84H147N20O39    | 3           | 687.3425         | 687.3488                    | 2375431                      | 687.3488                  | 2245791                      | 687.3488                  | 2088858                      |
| C84H147N20O39    | 2           | 1030.5101        | 1030.5145                   | 2463621                      | 1030.5145                 | 2492171                      | 1030.5145                 | 1801819                      |
| C89H153N21O41    | 3           | 697.0180         | 697.0205                    | 26910                        | 697.0205                  | 27493                        | 697.0205                  | 30761                        |
| C89H153N21O41    | 2           | 1045.0234        | 1045.0296                   | 13922                        | 1045.0296                 | 17671                        | 1045.0296                 | 9403                         |
| C89H152N20O42    | 3           | 697.3460         | 697.3433                    | 39355                        | 697.3548                  | 27778                        | 697.3548                  | 34868                        |
| C89H152N20O42    | 2           | 1045.5154        | 1045.5094                   | 3514                         | 1045.5094                 | 2705                         | 1045.5375                 | 0                            |
| C86H149N20O40    | 2           | 1051.5154        | 1051.5178                   | 225492                       | 1051.5178                 | 231409                       | 1051.5178                 | 173406                       |
| C87H152N21O40    | 3           | 711.0215         | 711.0260                    | 278888                       | 711.0260                  | 296145                       | 711.0260                  | 271687                       |
| C87H152N21O40    | 2           | 1066.0286        | 1066.0369                   | 167783                       | 1066.0369                 | 193689                       | 1066.0369                 | 162886                       |
| C87H151N20O41    | 3           | 711.3495         | 711.3519                    | 135823                       | 711.3519                  | 90245                        | 711.3519                  | 95479                        |
| C87H151N20O41    | 2           | 1066.5206        | 1066.5216                   | 95967                        | 1066.5216                 | 112004                       | 1066.5216                 | 96908                        |
| C89H154N21O41    | 3           | 725.0250         | 725.0297                    | 51550                        | 725.0297                  | 43064                        | 725.0297                  | 46018                        |
| C89H154N21O41    | 2           | 1087.0339        | 1087.0518                   | 26374                        | 1087.0518                 | 25687                        | 1087.0518                 | 31277                        |
| C89H153N20O42    | 3           | 725.3530         | 725.3417                    | 0                            | 725.3417                  | 0                            | 725.3417                  | 2241                         |
| C125H215N29O58   | 4           | 742.6211         | 742.6282                    | 52023                        | 742.6282                  | 61668                        | 742.6282                  | 48454                        |
| C125H215N29O58   | 3           | 989.8258         | 989.8304                    | 228495                       | 989.8304                  | 213964                       | 989.8304                  | 234433                       |
| C123H214N29O57   | 4           | 753.1238         | 753.1233                    | 480556                       | 753.1233                  | 468579                       | 753.1233                  | 422016                       |

|                |   |           |           |         |           |         |           |         |
|----------------|---|-----------|-----------|---------|-----------|---------|-----------|---------|
| C123H214N29O57 | 3 | 1003.8293 | 1003.8355 | 1885033 | 1003.8355 | 1900721 | 1003.8355 | 1626272 |
| C123H214N29O57 | 2 | 1505.2403 | 1505.2358 | 95798   | 1505.2528 | 96309   | 1505.2528 | 56325   |
| C128H220N30O59 | 4 | 760.3804  | 760.3776  | 117901  | 760.3776  | 99038   | 760.3896  | 89601   |
| C128H220N30O59 | 3 | 1013.5048 | 1013.5003 | 200311  | 1013.5003 | 179509  | 1013.5142 | 170992  |
| C125H216N29O58 | 4 | 763.6264  | 763.6317  | 68883   | 763.6317  | 43135   | 763.6317  | 59284   |
| C125H216N29O58 | 3 | 1017.8328 | 1017.8277 | 314070  | 1017.8277 | 334968  | 1017.8416 | 281297  |
| C125H216N29O58 | 2 | 1526.2456 | 1526.2452 | 7350    | 1526.2281 | 14579   | 1526.2623 | 4629    |
| C126H219N30O58 | 4 | 770.8831  | 770.8878  | 459857  | 770.8878  | 419544  | 770.8878  | 456507  |
| C126H219N30O58 | 3 | 1027.5083 | 1027.5174 | 2320544 | 1027.5174 | 2191730 | 1027.5174 | 2149093 |
| C126H219N30O58 | 2 | 1540.7588 | 1540.7609 | 126052  | 1540.7609 | 122412  | 1540.7609 | 63599   |
| C131H225N31O60 | 4 | 778.1397  | 778.1417  | 23061   | 778.1417  | 23845   | 778.1417  | 16441   |
| C131H225N31O60 | 3 | 1037.1838 | 1037.1686 | 64026   | 1037.1827 | 45019   | 1037.1968 | 27496   |
| C131H224N30O61 | 4 | 778.3857  | 778.3854  | 19159   | 778.3854  | 16414   | 773.3856  | 14987   |
| C131H224N30O61 | 3 | 1037.5118 | 1037.5063 | 0       | 1037.5063 | 0       | 1037.5203 | 8351    |
| C128H221N30O59 | 3 | 1041.5118 | 1041.5040 | 197187  | 1041.5040 | 292900  | 1041.5180 | 241437  |
| C128H221N30O59 | 2 | 1561.7641 | 1561.7743 | 12159   | 1561.7743 | 11710   | 1561.7743 | 4694    |
| C129H224N31O59 | 4 | 788.6423  | 788.6388  | 40613   | 788.6510  | 78225   | 788.6510  | 53685   |
| C129H224N31O59 | 3 | 1051.1874 | 1051.1922 | 334431  | 1051.1924 | 290749  | 1051.1922 | 330972  |
| C129H224N31O59 | 2 | 1576.2774 | 1576.2669 | 16428   | 1576.2842 | 13837   | 1576.2842 | 4513    |
| C129H223N30O60 | 3 | 1051.5154 | 1051.5178 | 141179  | 1051.5178 | 152626  | 1051.5178 | 129992  |
| C130H223N30O60 | 3 | 1055.5154 | 1055.5141 | 120888  | 1055.5141 | 163031  | 1055.5283 | 82233   |
| C131H226N31O60 | 3 | 1065.1909 | 1065.1959 | 76806   | 1065.2102 | 79128   | 1065.2102 | 59425   |
| C167H287N39O77 | 4 | 997.7455  | 997.7445  | 115478  | 997.7445  | 129187  | 997.7445  | 100998  |
| C167H287N39O77 | 3 | 1329.9916 | 1329.9854 | 26171   | 1330.0014 | 25683   | 1330.0014 | 25039   |
| C165H286N39O76 | 4 | 1008.2482 | 1008.2393 | 893695  | 1008.2532 | 892054  | 1008.2532 | 710345  |
| C165H286N39O76 | 3 | 1343.9951 | 1343.9862 | 463306  | 1344.0022 | 294207  | 1344.0022 | 374707  |
| C170H292N40O78 | 4 | 1015.5048 | 1015.5029 | 120491  | 1015.4889 | 98821   | 1015.5029 | 57445   |
| C170H292N40O78 | 3 | 1353.6706 | 1353.6551 | 49279   | 1353.6712 | 34261   | 1353.6872 | 23547   |
| C167H288N39O77 | 4 | 1018.7508 | 1018.4963 | 52623   | 1018.7472 | 44491   | 1018.7472 | 41006   |
| C167H288N39O77 | 3 | 1357.9986 | 1357.9796 | 49390   | 1357.9958 | 43717   | 1357.9958 | 0       |
| C168H291N40O77 | 4 | 1026.0074 | 1026.0065 | 787829  | 1026.0065 | 701257  | 1026.0065 | 931282  |
| C168H291N40O77 | 3 | 1367.6742 | 1367.6665 | 288917  | 1367.6665 | 275457  | 1367.6826 | 239057  |
| C173H297N41O79 | 4 | 1033.2641 | 1033.2915 | 16889   | 1033.2775 | 25552   | 1033.2775 | 25928   |
| C173H297N41O79 | 3 | 1377.3497 | 1377.3229 | 4081    | 1377.3391 | 6742    | 1377.3552 | 8283    |
| C173H296N40O80 | 4 | 1033.5101 | 1033.5021 | 5694    | 1033.5021 | 0       | 1033.5161 | 10936   |
| C173H296N40O80 | 3 | 1377.6777 | 1377.6631 | 280     | 1377.6793 | 5858    | 1377.6793 | 1552    |
| C170H293N40O78 | 4 | 1036.5101 | 1036.5080 | 137564  | 1036.5080 | 143837  | 1036.5080 | 90992   |
| C170H293N40O78 | 3 | 1381.6777 | 1381.6687 | 17969   | 1381.6687 | 33934   | 1381.6687 | 17416   |
| C171H296N41O78 | 4 | 1043.7667 | 1043.7595 | 114556  | 1043.7595 | 131193  | 1043.7595 | 61187   |
| C171H296N41O78 | 3 | 1391.3532 | 1391.3418 | 15617   | 1391.3582 | 10732   | 1391.3582 | 4869    |
| C173H298N41O79 | 4 | 1054.2694 | 1054.2694 | 0       | 1054.2694 | 0       | 1054.2804 | 4691    |

<sup>1,2,3</sup> Observed peaks (m/z) and their corresponding integrals in three independent measurements.



Supplementary Table S4. List of peptidoglycan fragments observed by LC-MS for vancomycin-resistant *E. faecalis* (ATCC 51299) grown in presence of vancomycin (6 µg/mL) during the stationary growth phase (OD<sub>600</sub> > 1.0). Chemical formula shown are for non-ionized peptidoglycan fragments.

| Chemical Formula | Charge Obs. | Calculated (m/z) | Observed <sup>1</sup> (m/z) | Scaled integral <sup>1</sup> | Observed <sup>2</sup> m/z | Scaled integral <sup>2</sup> | Observed <sup>3</sup> m/z | Scaled integral <sup>3</sup> |
|------------------|-------------|------------------|-----------------------------|------------------------------|---------------------------|------------------------------|---------------------------|------------------------------|
| C41H71N9O20      | 2           | 463.7375         | 463.6990                    | 11045                        | 463.6990                  | 11742                        | 463.7084                  | 10627                        |
| C39H70N9O19      | 2           | 484.7428         | 484.7191                    | 22461                        | 484.7191                  | 20683                        | 484.7287                  | 21090                        |
| C44H76N10O21     | 2           | 499.2560         | 499.2253                    | 5278                         | 499.2253                  | 6270                         | 499.2253                  | 3781                         |
| C41H72N9O20      | 2           | 505.7480         | 505.7237                    | 20271                        | 505.7237                  | 18022                        | 505.7335                  | 16204                        |
| C42H75N10O20     | 2           | 520.2613         | 520.2399                    | 160426                       | 520.2399                  | 144727                       | 520.2498                  | 152752                       |
| C47H81N11O22     | 2           | 534.7746         | 534.7697                    | 61034                        | 534.7697                  | 61111                        | 534.7797                  | 54205                        |
| C47H80N10O23     | 2           | 535.2666         | 535.2645                    | 37547                        | 535.2544                  | 35925                        | 535.2746                  | 34159                        |
| C44H77N10O21     | 2           | 541.2666         | 541.3016                    | 188023                       | 541.3016                  | 185352                       | 541.3118                  | 182454                       |
| C45H80N11O21     | 2           | 555.7799         | 555.7911                    | 41204                        | 555.7911                  | 45365                        | 555.8014                  | 43690                        |
| C45H79N10O22     | 2           | 556.2719         | 556.2750                    | 39334                        | 556.2750                  | 46949                        | 556.2853                  | 49855                        |
| C47H82N11O22     | 2           | 576.7852         | 576.7774                    | 18328                        | 576.7774                  | 15609                        | 576.7879                  | 17319                        |
| C47H81N10O23     | 2           | 577.2772         | 577.2704                    | 32087                        | 577.2704                  | 32331                        | 577.2809                  | 31355                        |
| C83H143N19O39    | 3           | 649.6599         | 649.6593                    | 43292                        | 649.6593                  | 43766                        | 649.6705                  | 58182                        |
| C83H143N19O39    | 2           | 973.9862         | 973.9758                    | 35787                        | 973.9758                  | 41972                        | 974.0030                  | 40457                        |
| C81H142N19O38    | 3           | 663.6634         | 663.6667                    | 403892                       | 663.6667                  | 352004                       | 663.6667                  | 378640                       |
| C81H142N19O38    | 2           | 994.9915         | 994.9899                    | 1016054                      | 994.9899                  | 1107781                      | 994.9899                  | 973420                       |
| C86H148N20O40    | 3           | 673.3390         | 673.3409                    | 61976                        | 673.3409                  | 60310                        | 673.3522                  | 58463                        |
| C86H148N20O40    | 2           | 1009.5048        | 1009.5031                   | 38340                        | 1009.5031                 | 43796                        | 1009.5170                 | 37385                        |
| C83H144N19O39    | 3           | 677.6670         | 677.6643                    | 210227                       | 677.6643                  | 92763                        | 677.6643                  | 81013                        |
| C83H144N19O39    | 2           | 1015.9968        | 1015.9919                   | 207871                       | 1015.9919                 | 216118                       | 1015.9919                 | 168872                       |
| C84H147N20O39    | 3           | 687.3425         | 687.3481                    | 698214                       | 687.3481                  | 682818                       | 687.3481                  | 650380                       |
| C84H147N20O39    | 2           | 1030.5101        | 1030.5028                   | 1066519                      | 1030.5028                 | 1279767                      | 1030.5028                 | 1228354                      |
| C89H153N21O41    | 3           | 697.0180         | 697.0199                    | 11692                        | 697.0199                  | 12387                        | 697.0314                  | 13495                        |
| C89H153N21O41    | 2           | 1045.0234        | 1045.0175                   | 4927                         | 1045.0175                 | 6313                         | 1045.0459                 | 5625                         |
| C89H152N20O42    | 2           | 1045.5154        | 1045.4975                   | 560                          | 1045.5116                 | 299                          | 1045.5257                 | 399                          |
| C86H149N20O40    | 2           | 1051.5154        | 1051.5201                   | 126543                       | 1051.5201                 | 146556                       | 1051.5201                 | 120885                       |
| C87H152N21O40    | 3           | 711.0215         | 711.0255                    | 95613                        | 711.0255                  | 85890                        | 711.0255                  | 93832                        |
| C87H152N21O40    | 2           | 1066.0286        | 1066.0251                   | 71088                        | 1066.0251                 | 74886                        | 1066.0251                 | 70315                        |
| C87H151N20O41    | 3           | 711.3495         | 711.3515                    | 68886                        | 711.3515                  | 36393                        | 711.3515                  | 36860                        |
| C87H151N20O41    | 2           | 1066.5206        | 1066.5240                   | 81339                        | 1066.5240                 | 78136                        | 1066.5240                 | 78263                        |
| C88H151N20O41    | 2           | 1072.5206        | 1072.5209                   | 27005                        | 1072.5209                 | 35935                        | 1072.5209                 | 19899                        |
| C89H154N21O41    | 3           | 725.0250         | 725.0411                    | 40551                        | 725.0411                  | 29508                        | 725.0411                  | 28167                        |
| C89H154N21O41    | 2           | 1087.0339        | 1087.0544                   | 11356                        | 1087.0544                 | 15723                        | 1087.0544                 | 14658                        |
| C89H153N20O42    | 3           | 725.3530         | 725.3531                    | 207738                       | 725.3531                  | 164034                       | 725.3531                  | 161808                       |
| C89H153N20O42    | 2           | 1087.5259        | 1087.5439                   | 123355                       | 1087.5439                 | 119805                       | 1087.5439                 | 119086                       |
| C125H215N29O58   | 4           | 742.6211         | 742.6160                    | 16529                        | 742.6160                  | 11110                        | 742.6279                  | 10036                        |

|                |   |           |           |         |           |         |           |         |
|----------------|---|-----------|-----------|---------|-----------|---------|-----------|---------|
| C125H215N29O58 | 3 | 989.8258  | 989.8184  | 91157   | 989.8184  | 88515   | 989.8322  | 92124   |
| C123H214N29O57 | 4 | 753.1238  | 753.1231  | 52641   | 753.1231  | 42036   | 753.1351  | 50084   |
| C123H214N29O57 | 3 | 1003.8293 | 1003.8236 | 872072  | 1003.8236 | 925506  | 1003.8512 | 877802  |
| C123H214N29O57 | 2 | 1505.2403 | 1505.2425 | 50141   | 1505.2425 | 46334   | 1505.2594 | 55901   |
| C128H220N30O59 | 4 | 760.3804  | 760.3775  | 15215   | 760.3775  | 11226   | 760.3895  | 15508   |
| C128H220N30O59 | 3 | 1013.5048 | 1013.5024 | 102146  | 1013.5024 | 96269   | 1013.5162 | 104676  |
| C125H216N29O58 | 3 | 1017.8328 | 1017.8297 | 229148  | 1017.8297 | 226122  | 1017.8436 | 217742  |
| C125H216N29O58 | 2 | 1526.2456 | 1526.2351 | 11918   | 1526.2351 | 10998   | 1526.2691 | 14235   |
| C126H219N30O58 | 4 | 770.8831  | 770.8877  | 89550   | 770.8756  | 81161   | 770.8998  | 75994   |
| C126H219N30O58 | 3 | 1027.5083 | 1027.5055 | 1126725 | 1027.5055 | 1097979 | 1027.5195 | 1088561 |
| C126H219N30O58 | 2 | 1540.7588 | 1540.7507 | 65560   | 1540.7507 | 66674   | 1540.7850 | 68382   |
| C127H218N29O59 | 3 | 1031.8363 | 1031.8363 | 0       | 1031.8205 | 24372   | 1031.7994 | 0       |
| C131H225N31O60 | 4 | 778.1397  | 778.1418  | 8861    | 778.1418  | 7739    | 778.1539  | 8408    |
| C131H225N31O60 | 3 | 1037.1838 | 1037.1708 | 4074    | 1037.1848 | 5818    | 1037.1989 | 11505   |
| C128H221N30O59 | 3 | 1041.5118 | 1041.5061 | 190734  | 1041.5203 | 158653  | 1041.5343 | 174629  |
| C128H221N30O59 | 2 | 1561.7641 | 1561.7644 | 8236    | 1561.7644 | 9656    | 1561.7816 | 11748   |
| C129H224N31O59 | 4 | 788.6423  | 788.6388  | 7671    | 788.6388  | 3650    | 788.6511  | 3619    |
| C129H224N31O59 | 3 | 1051.1874 | 1051.1803 | 76275   | 1051.1803 | 75975   | 1051.2086 | 65467   |
| C129H224N31O59 | 2 | 1576.2774 | 1576.2568 | 2407    | 1576.2742 | 2864    | 1576.2915 | 2878    |
| C129H223N30O60 | 3 | 1051.5154 | 1051.5060 | 65347   | 1051.5060 | 66485   | 1051.5343 | 69445   |
| C130H223N30O60 | 3 | 1055.5154 | 1055.5165 | 35225   | 1055.5165 | 22391   | 1055.5307 | 22981   |
| C131H226N31O60 | 3 | 1065.1909 | 1065.1841 | 71383   | 1065.1984 | 20873   | 1065.2126 | 49031   |
| C131H225N30O61 | 3 | 1065.5189 | 1065.5261 | 58616   | 1065.5261 | 102532  | 1065.5404 | 81662   |
| C131H225N30O61 | 2 | 1597.7747 | 1597.7722 | 4578    | 1597.7722 | 0       | 1597.8246 | 3804    |
| C132H225N30O61 | 3 | 1069.5189 | 1069.4777 | 10914   | 1069.5205 | 16277   | 1069.5205 | 9091    |
| C133H227N30O62 | 3 | 1079.5224 | 1079.5244 | 19510   | 1079.5244 | 15145   | 1079.5531 | 12821   |
| C167H287N39O77 | 4 | 997.7455  | 997.7325  | 22421   | 997.7325  | 20347   | 997.7739  | 18087   |
| C167H287N39O77 | 3 | 1329.9916 | 1329.9904 | 11286   | 1329.9585 | 14754   | 1330.0062 | 12486   |
| C165H286N39O76 | 4 | 1008.2482 | 1008.2411 | 241404  | 1008.2411 | 232314  | 1008.2689 | 193818  |
| C165H286N39O76 | 3 | 1343.9951 | 1343.9912 | 157703  | 1343.9912 | 161446  | 1344.0072 | 167857  |
| C170H292N40O78 | 4 | 1015.5048 | 1015.4909 | 9625    | 1015.4909 | 18099   | 1015.5188 | 26947   |
| C170H292N40O78 | 3 | 1353.6706 | 1353.6602 | 16062   | 1353.6442 | 20969   | 1353.6763 | 14540   |
| C167H288N39O77 | 4 | 1018.7508 | 1018.7492 | 58472   | 1018.7492 | 51226   | 1018.7632 | 50899   |
| C167H288N39O77 | 3 | 1357.9986 | 1358.0008 | 37753   | 1357.9848 | 27509   | 1358.0170 | 25174   |
| C168H291N40O77 | 4 | 1026.0074 | 1026.0085 | 298029  | 1025.9946 | 288150  | 1026.0225 | 299408  |
| C168H291N40O77 | 3 | 1367.6742 | 1367.6717 | 169462  | 1367.6717 | 175897  | 1367.6879 | 153137  |
| C169H290N39O78 | 4 | 1029.2534 | 1029.2416 | 12398   | 1029.2557 | 12334   | 1029.2557 | 10801   |
| C169H290N39O78 | 3 | 1372.0022 | 1372.0024 | 7810    | 1371.9862 | 11225   | 1372.0348 | 8547    |
| C173H296N40O80 | 4 | 1033.5101 | 1033.5041 | 12312   | 1033.5041 | 3037    | 1033.5182 | 8231    |
| C173H296N40O80 | 3 | 1377.6777 | 1377.6685 | 748     | 1377.6685 | 3729    | 1337.6861 | 1569    |
| C170H293N40O78 | 4 | 1036.5101 | 1036.5101 | 30467   | 1036.5101 | 29998   | 1036.5242 | 30731   |
| C170H293N40O78 | 3 | 1381.6777 | 1381.6742 | 25801   | 1381.6580 | 28851   | 1381.6903 | 35309   |
| C171H296N41O78 | 4 | 1043.7667 | 1043.7619 | 20269   | 1043.7619 | 24828   | 1043.7759 | 35480   |
| C171H296N41O78 | 3 | 1391.3532 | 1391.3473 | 11098   | 1391.3473 | 15220   | 1391.3635 | 17371   |
| C171H295N40O79 | 4 | 1044.0127 | 1044.0016 | 5336    | 1044.0298 | 6591    | 1044.0298 | 8384    |
| C171H295N40O79 | 3 | 1391.6812 | 1391.6730 | 7681    | 1391.6730 | 5675    | 1391.6892 | 11435   |
| C172H295N40O79 | 4 | 1047.0127 | 1047.0087 | 18412   | 1047.0087 | 8854    | 1047.0369 | 12574   |
| C172H295N40O79 | 3 | 1395.6812 | 1395.6664 | 2972    | 1395.6664 | 4033    | 1395.6826 | 7664    |

|                |   |           |           |       |           |       |           |       |
|----------------|---|-----------|-----------|-------|-----------|-------|-----------|-------|
| C173H298N41O79 | 4 | 1054.2694 | 1054.2686 | 16808 | 1054.2686 | 12278 | 1054.2827 | 18620 |
| C173H298N41O79 | 3 | 1405.3567 | 1405.3882 | 6193  | 1405.2738 | 6971  | 1405.3555 | 6644  |
| C173H297N40O80 | 4 | 1054.5154 | 1054.5238 | 7815  | 1054.5095 | 12174 | 1054.5380 | 5903  |
| C173H297N40O80 | 3 | 1405.6847 | 1405.6829 | 4108  | 1405.6665 | 4335  | 1405.6992 | 9314  |

<sup>1,2,3</sup> Observed peaks (m/z) and their corresponding integrals in three independent measurements.
